# Supplementary material for: Impact of the COVID-19 Pandemic on the Therapeutic Continuity among Outpatients with Chronic Cardiovascular Therapies
Source: MDPI journal article supplement (doi:10.3390/ijerph191912101), 2022-09-24
Supplement: s1 [file s1]

# Impact of the COVID-19 Pandemic on the Therapeutic Continuity among Outpatients with Chronic Cardiovascular Therapies

Manuela Casula <sup>1,2</sup>, Federica Galimberti <sup>2</sup>, Marica Iommi <sup>3</sup>, Elena Olmastroni <sup>1,\*</sup>, Simona Rosa <sup>4</sup>, Mattia Altini <sup>5</sup>, Alberico L. Catapano <sup>1,2</sup>, Elena Tragni <sup>1</sup> and Elisabetta Poluzzi <sup>3</sup>

<sup>1</sup> Epidemiology and Preventive Pharmacology Service (SEFAP), Department of Pharmacological and Biomolecular Sciences, University of Milan, Via Balzaretti 9, 20133 Milan, Italy

<sup>2</sup> IRCCS MultiMedica, Via Milanese 300, Sesto S. Giovanni, 20099 Milan, Italy

<sup>3</sup> Department of Medical and Surgical Sciences-Pharmacology Unit, University of Bologna, Via Irnerio 48, 40126 Bologna, Italy

<sup>4</sup> Department of Biomedical and Neuromotor Sciences-Hygiene and Biostatistics Unit, University of Bologna, Via San Giacomo, 40126 Bologna, Italy

<sup>5</sup> Romagna Local Health Authority, Emilia-Romagna Region, Via A. De Gasperi 8, 48121 Ravenna, Italy

\* Correspondence: elena.olmastroni@unimi.it

**Table S1.** List of ATC codes for each cohort.

| Chronic Treatment           | ATC Codes                                                                                                                                                                                                                                                                                                                                                                                                                                                                                                                                                                                                                                                                                                                                                                                                                                            |
|-----------------------------|------------------------------------------------------------------------------------------------------------------------------------------------------------------------------------------------------------------------------------------------------------------------------------------------------------------------------------------------------------------------------------------------------------------------------------------------------------------------------------------------------------------------------------------------------------------------------------------------------------------------------------------------------------------------------------------------------------------------------------------------------------------------------------------------------------------------------------------------------|
| <b>Lipid-lowering drugs</b> | <p><b>Class 1 (statins):</b> C10AA, C10BA02, C10BA05, C10BA06</p> <p><b>Class 2 (PCSK9 inhibitors):</b> C10AX13, C10AX14</p> <p><b>Class 3 (ezetimibe):</b> C10AX09, C10BA02, C10BA05, C10BA06</p>                                                                                                                                                                                                                                                                                                                                                                                                                                                                                                                                                                                                                                                   |
| <b>Antidiabetics</b>        | <p><b>Class 1 (biguanides):</b> A10BA, A10BD02, A10BD05, A10BD07, A10BD08, A10BD10, A10BD11, A10BD13, A10BD15, A10BD16, A10BD20, A10BD23</p> <p><b>Class 2 (sulfonylureas):</b> A10BB, A10BD02, A10BD06</p> <p><b>Class 3 (sulfonamides):</b> A10BC</p> <p><b>Class 4 (alpha glucosidase inhibitors):</b> A10BF</p> <p><b>Class 5 (thiazolidinediones):</b> A10BG, A10BD05, A10BD06, A10BD09</p> <p><b>Class 6 (dipeptidyl peptidase 4 (DPP-4) inhibitors):</b> A10BH, A10BD07, A10BD08, A10BD09, A10BD10, A10BD11, A10BD13, A10BD19, A10BD21</p> <p><b>Class 7 (glucagon-like peptide-1 (GLP-1) analogues):</b> A10BJ</p> <p><b>Class 8 (sodium-glucose co-transporter 2 (SGLT2) inhibitors):</b> A10BK, A10BD15, A10BD16, A10BD19, A10BD20, A10BD21, A10BD23</p> <p><b>Class 9 (other blood glucose lowering drugs, excl. insulins):</b> A10BX</p> |
| <b>Antihypertensives</b>    | <p><b>Class 1 (antiadrenergic agents):</b> C02</p> <p><b>Class 2 (diuretics):</b> C03, C07BB, C07CB, C09BA, C09BX01, C09DA, C09XA52</p> <p><b>Class 3 (beta blocking agents):</b> C07, C07BB, C07CB, C09BX02</p> <p><b>Class 4 (calcium channel blockers):</b> C08, C09BB, C09BX01, C09DB</p> <p><b>Class 5 (agents acting on the renin-angiotensin system):</b> C09, C09BA, C09BB, C09BX01, C09BX02, C09DA, C09DB, C09XA52</p>                                                                                                                                                                                                                                                                                                                                                                                                                      |

**Figure S1.** Example of PDC calculation for an individual with two concurrent therapeutic classes within the same chronic therapy.

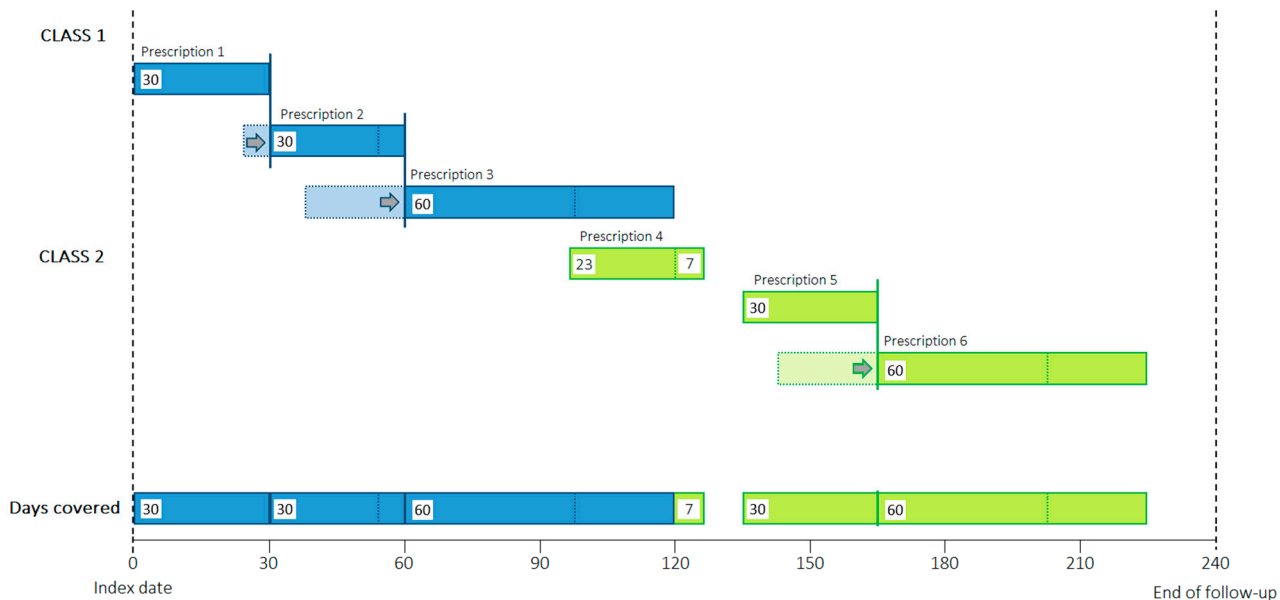

Days of follow-up: 240

Days covered: 30 + 30 + 60 + 7 + 30 + 60 = 217

Proportion of days covered (PDC):  $\frac{217}{240} = 0.90$

Figure S2. Timeline of the study.

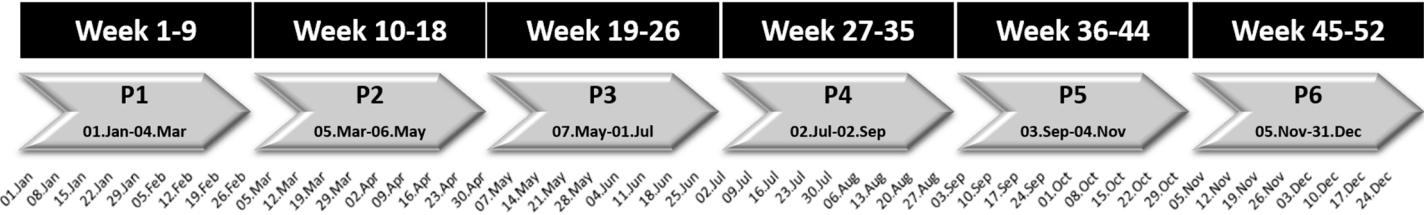

**Figure S3.** Difference in dispensed packages per 1000 patients between study and control periods by sex.

(A) Lipid-lowering drugs

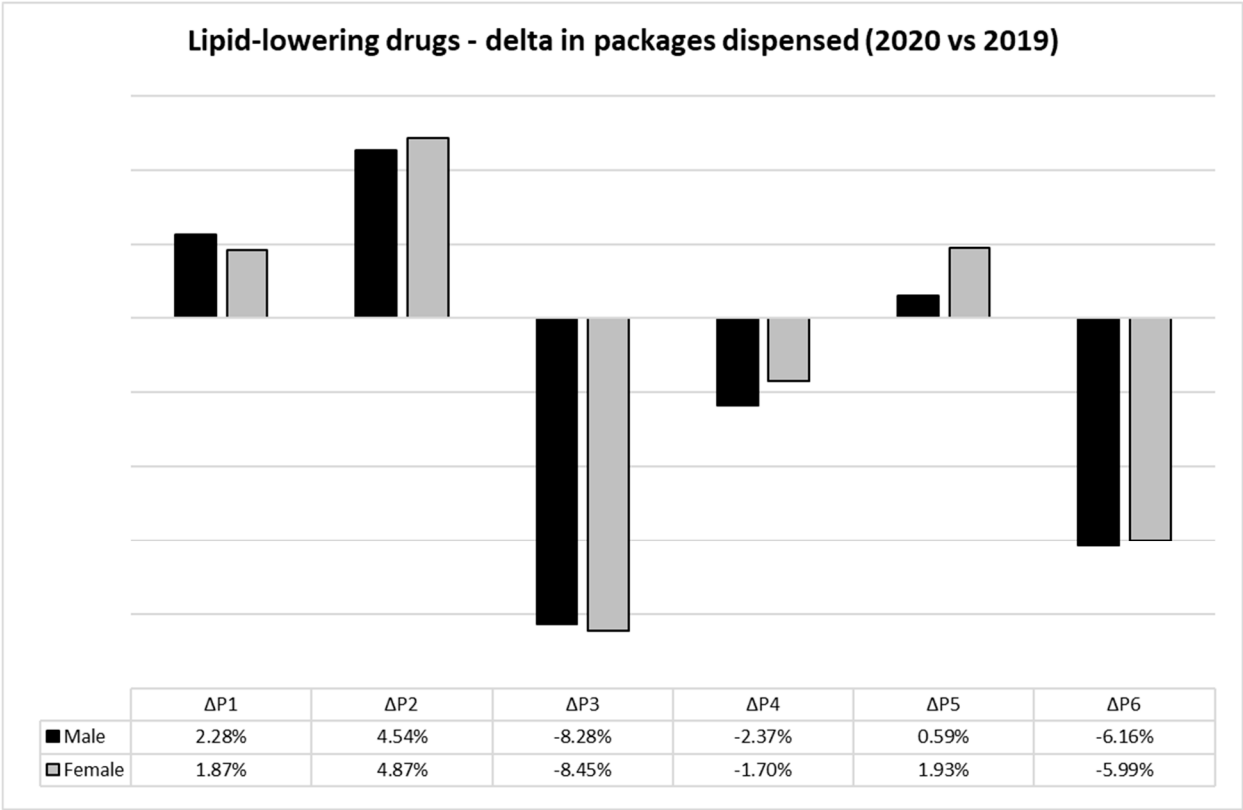

(B) Antidiabetic drugs

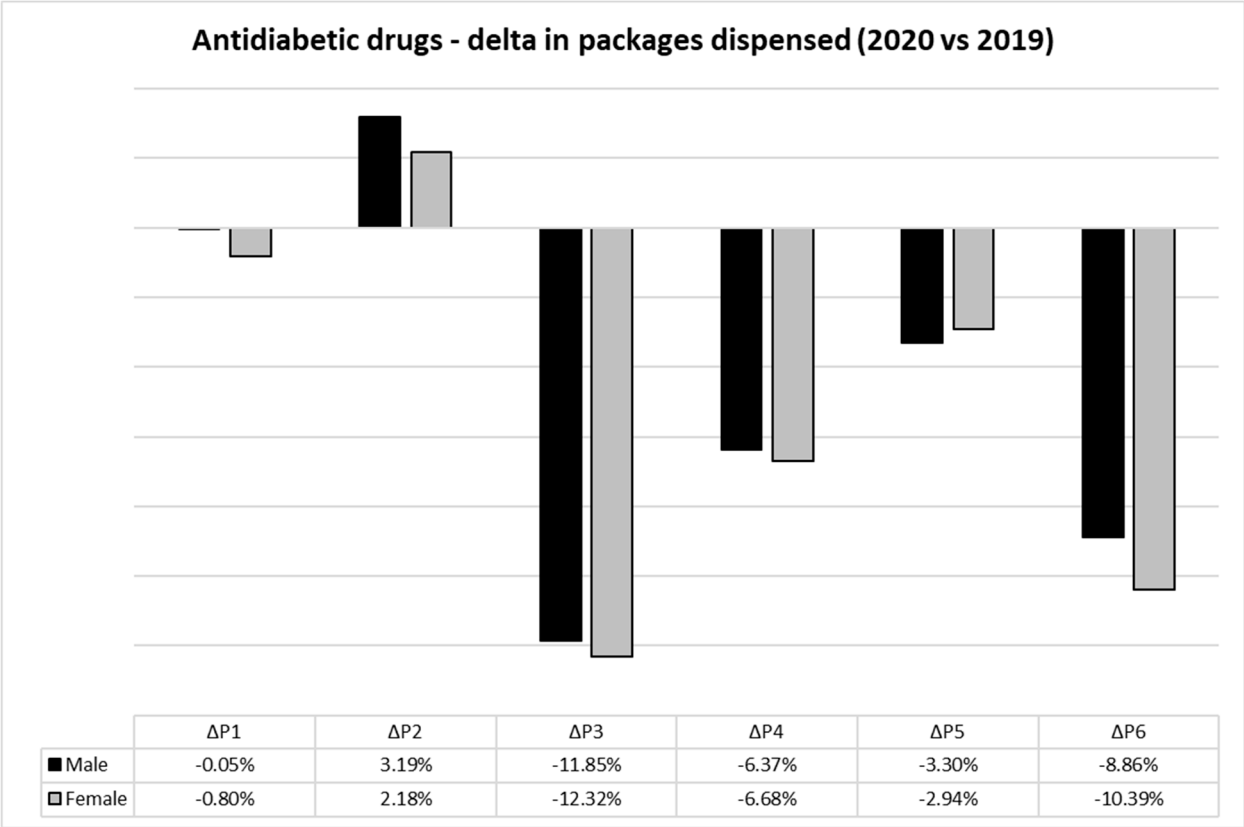

(C) Antihypertensive drugs

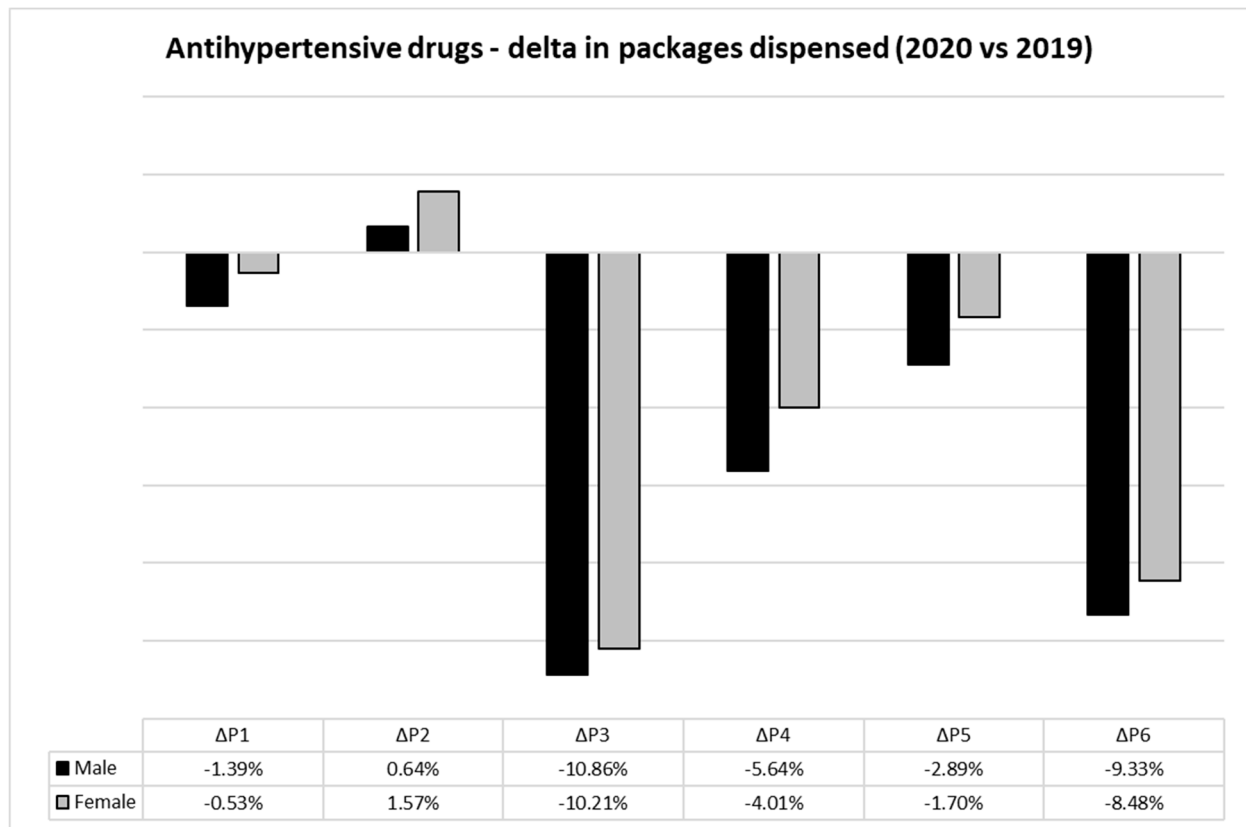

**Figure S4.** Difference in dispensed packages per 1000 patients between study and control periods by age groups.

(A) Lipid-lowering drugs

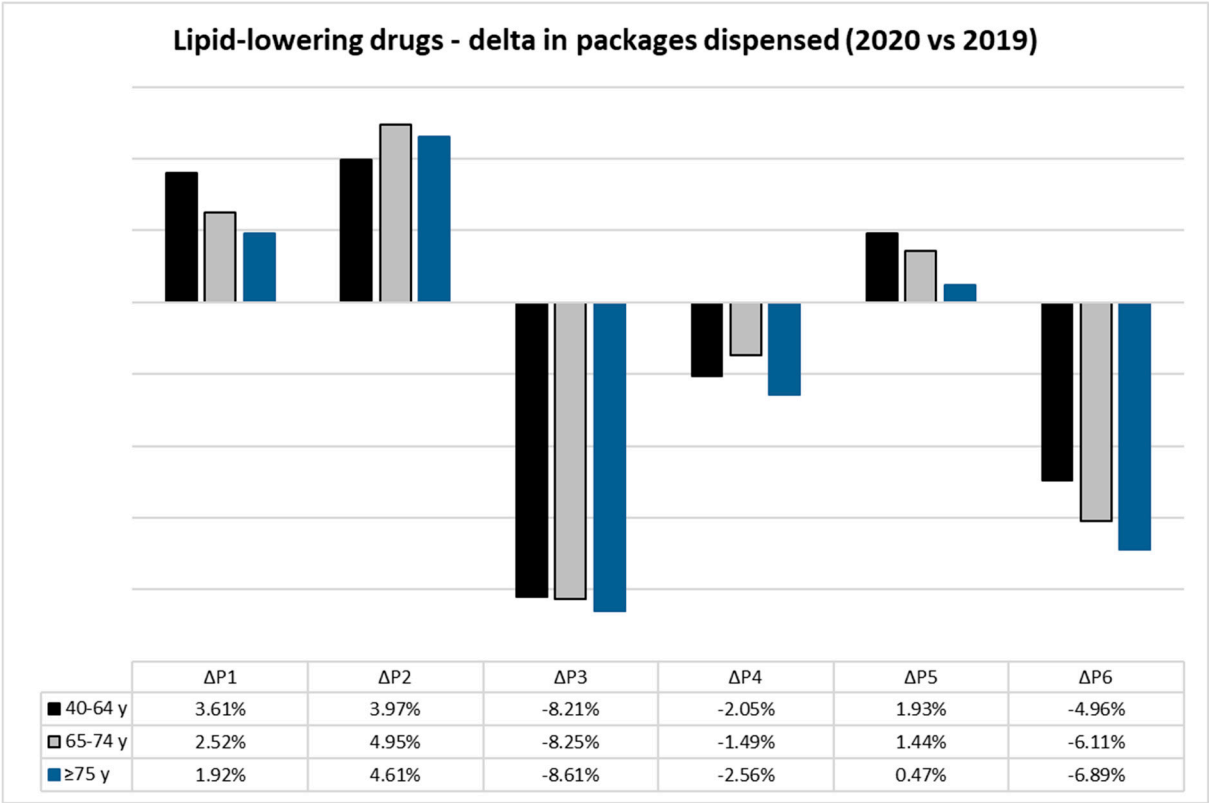



(B) Antidiabetic drugs

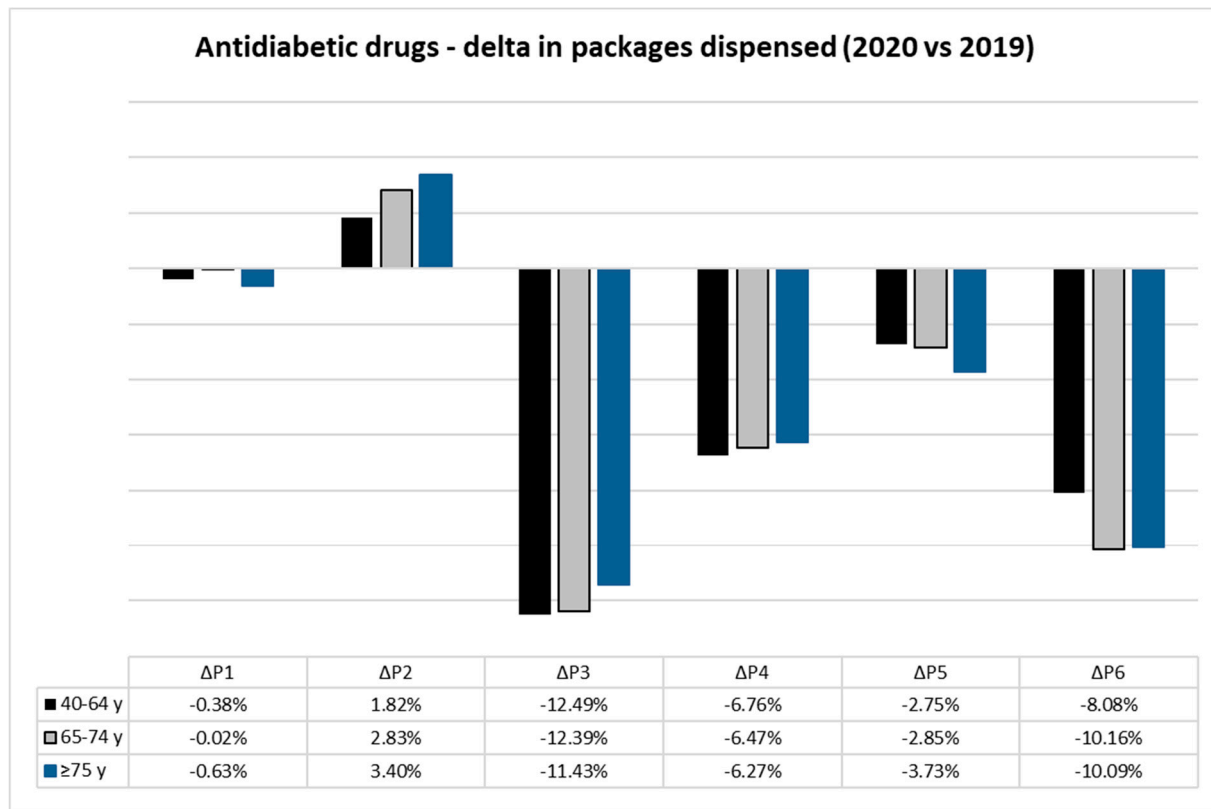

(C) Antihypertensive drugs

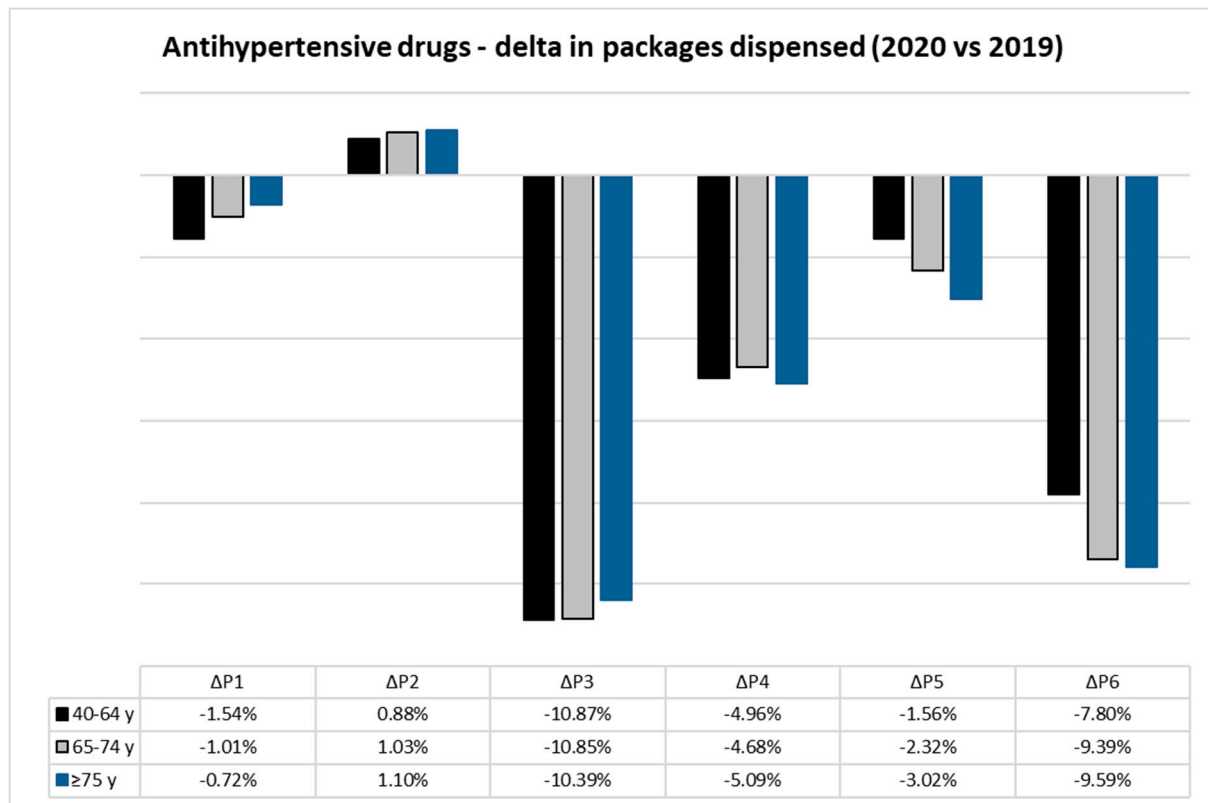

**Figure S5.** Fifty two-week trends in chronic therapies dispensing in the population by metropolitan areas (those in dark blue represent areas with more COVID-19 cases recorded in 2020, while in light blue those with fewer cases)

(A) Lipid-lowering drugs

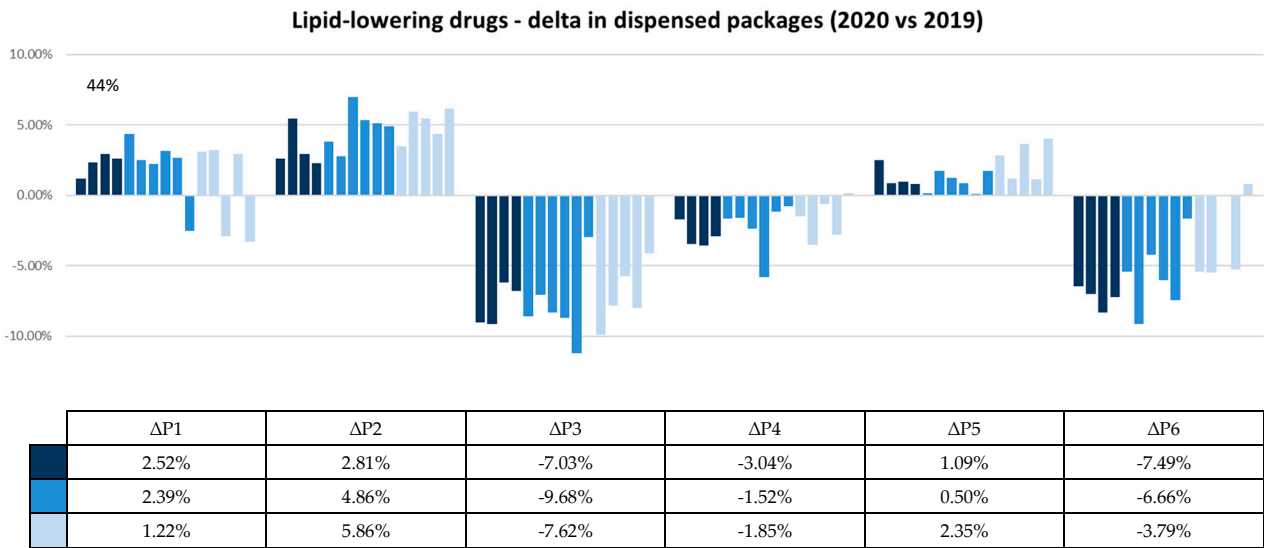

(B) Antidiabetic drugs

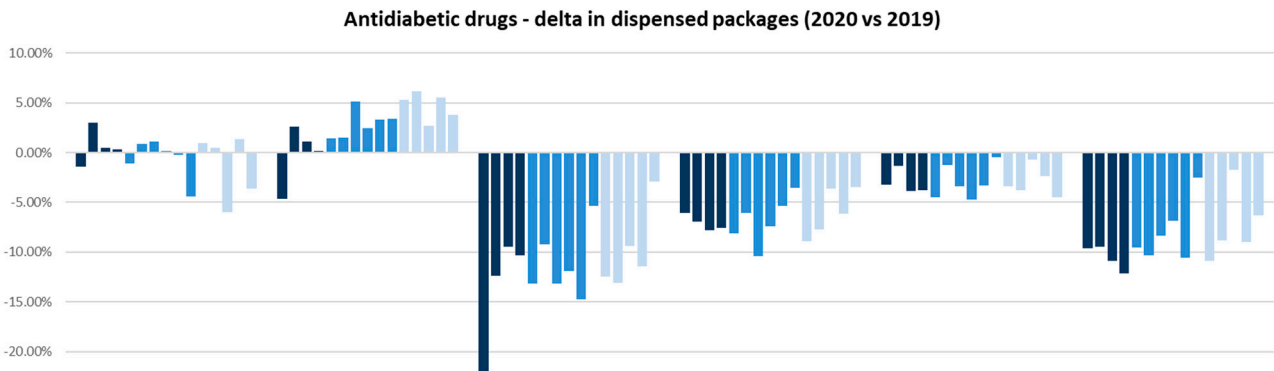

|  | $\Delta P1$ | $\Delta P2$ | $\Delta P3$ | $\Delta P4$ | $\Delta P5$ | $\Delta P6$ |
|--|-------------|-------------|-------------|-------------|-------------|-------------|
|  | 0.32%       | 0.06%       | -11.74%     | -7.41%      | -3.56%      | -11.18%     |
|  | -0.60%      | 3.02%       | -12.98%     | -5.96%      | -3.01%      | -10.97%     |
|  | -0.60%      | 4.95%       | -10.81%     | -6.48%      | -2.94%      | -8.22%      |

### (C) Antihypertensive drugs

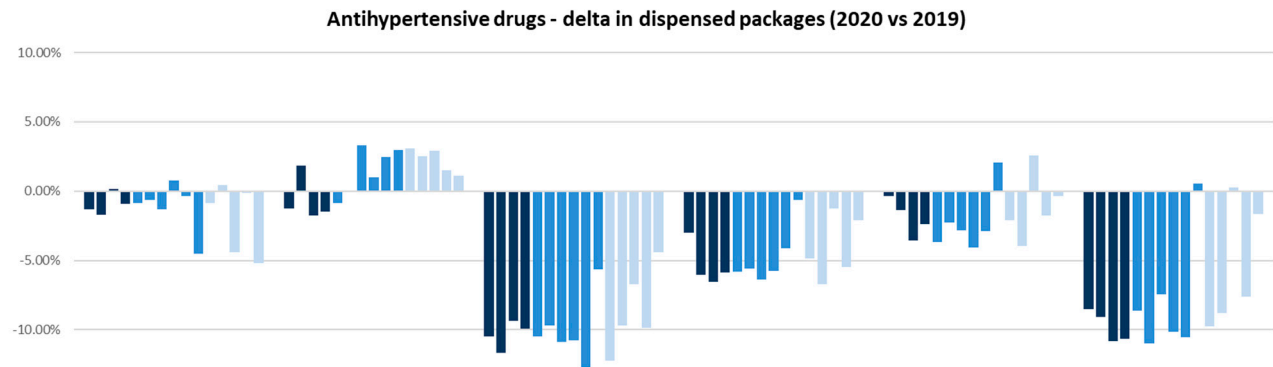

|  | $\Delta P1$ | $\Delta P2$ | $\Delta P3$ | $\Delta P4$ | $\Delta P5$ | $\Delta P6$ |
|--|-------------|-------------|-------------|-------------|-------------|-------------|
|  | -0.65%      | -1.30%      | -9.95%      | -5.73%      | -2.45%      | -10.31%     |
|  | -0.83%      | 1.87%       | -11.45%     | -4.39%      | -2.59%      | -9.25%      |
|  | -1.46%      | 2.28%       | -9.54%      | -4.57%      | -1.57%      | -6.84%      |
